# Supplementary material for: A novel polysiloxane elastomer based on reversible aluminum-carboxylate coordination
Source: Royal Society of Chemistry journal article supplement (doi:10.1039/c8nj04761h), 2018-11-19
Supplement: c8nj04761h1.pdf [file c8nj04761h1.pdf]

**Electronic Supplementary Information (ESI) for**

**A Novel Polysiloxane Elastomer Based on Reversible Aluminum-Carboxylate  
Coordination**

Yufeng Lei, Weiyan Huang, Qiuping Huang, Anqiang Zhang \*

Department of Polymer Materials Science and Engineering, School of Materials Science and Engineering,  
South China University of Technology, 381 Wushan Rd., Guangzhou 510641, Guangdong, China

\* Corresponding author: [aqzhang@scut.edu.cn](mailto:aqzhang@scut.edu.cn)

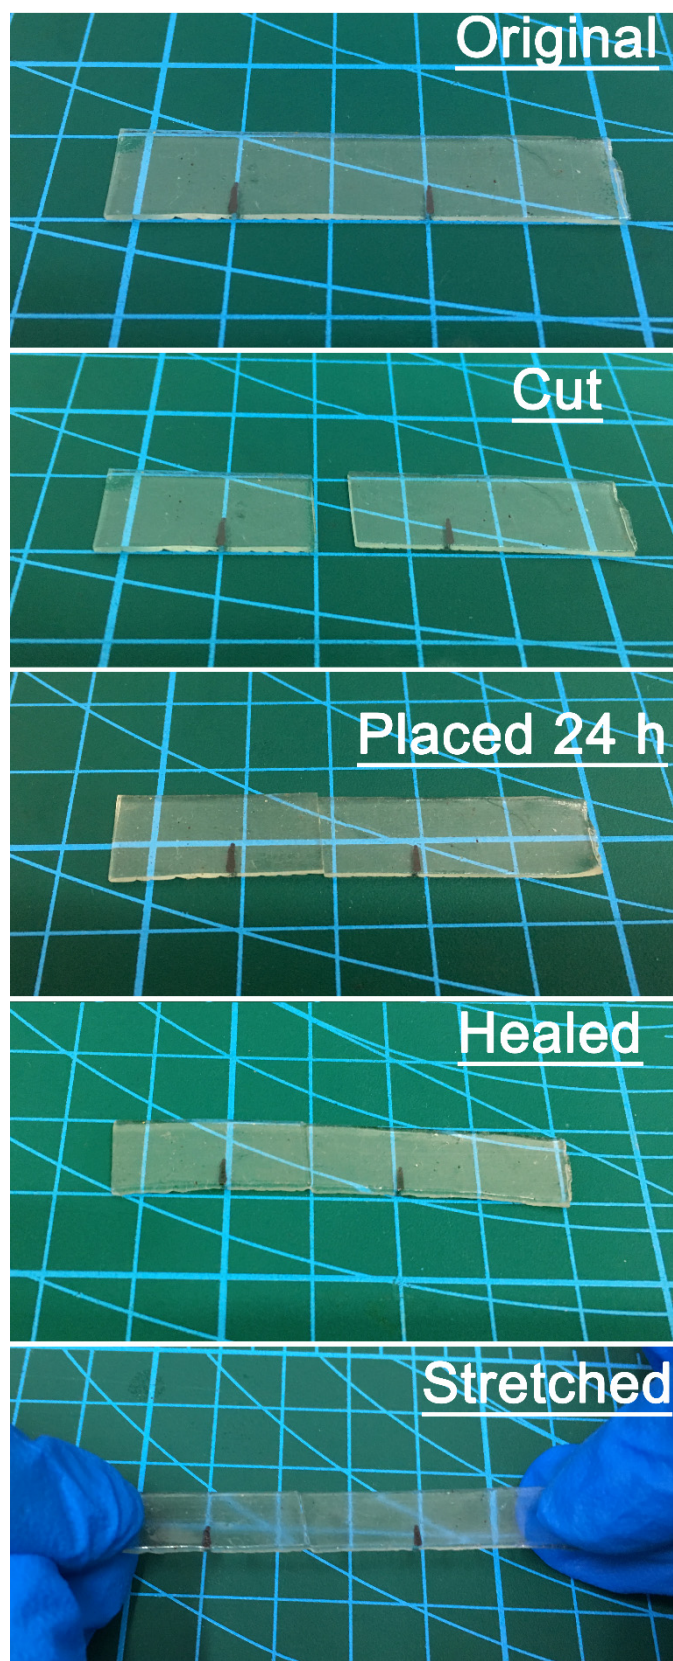

**Figure S1.** Digital photos shows the self-healing of Al(III)-CPDMS.

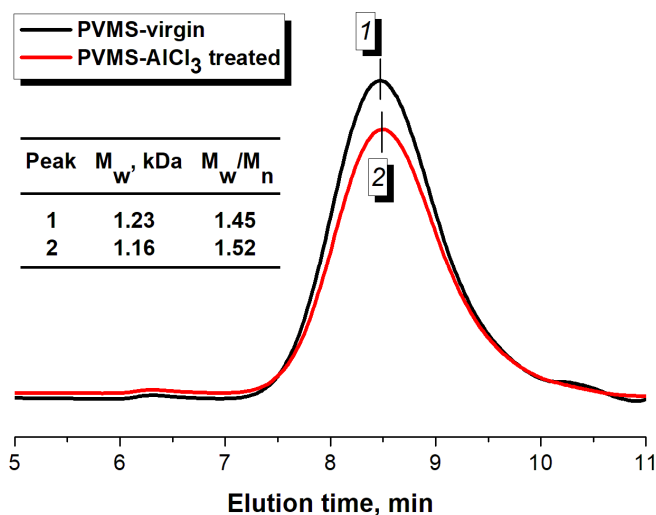

**Figure S2.** GPC traces of PVMS (10 kDa, 1 vinyl per 2000 kDa) before and after  $\text{AlCl}_3$  treatment, black and red line, respectively. The  $\text{AlCl}_3$  treatment was conducted by mixing the PVMS-chloroform solution and  $\text{AlCl}_3$ -acetonitrile solution, and then the solvents were evaporated at 60 °C, the residue was dried under vacuum at 80 °C, which was the same procedure as the preparation of  $\text{Al(III)-CPDMS}$ . Then the PVMS were re-dissolved in chloroform for GPC test.

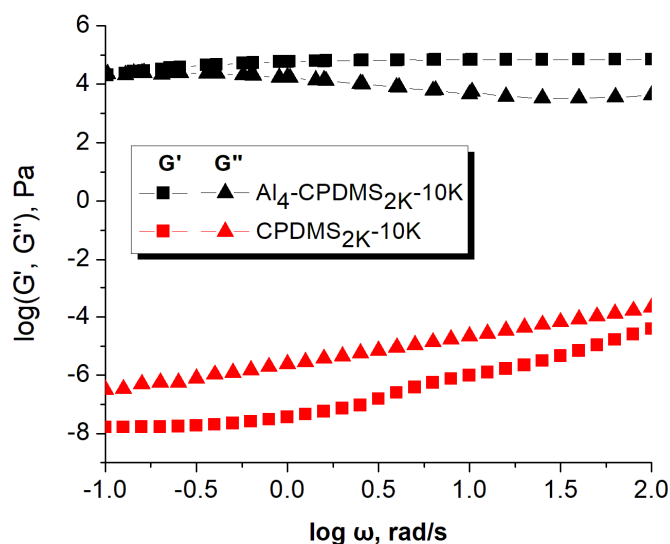

**Figure S3.** Dynamic frequency sweep of CPDMS and  $\text{Al(III)-CPDMS}$  at 10 °C. For CPDMS, the value of  $G''$  is always higher than  $G'$ , while for  $\text{Al(III)-CPDMS}$ , the rubbery plateau with  $G' > G''$  was observed. This difference shows that the  $\text{Al(III)-carboxylate}$  coordination bonds crosslinked the linear CPDMS to form an elastic network.
